1 A high-quality functional genome assembly of *Delia radicum* L. (Diptera: Anthomiidae) annotated from  
2 egg to adult

3

4 Short running title (max. 45 characters): A high-quality genome of the cabbage root fly

5

6 Rebekka Sontowski<sup>1,2, #</sup>, Yvonne Poeschl<sup>2,3,4, #</sup>, Yu Okamura<sup>5</sup>, Heiko Vogel<sup>5</sup>, Cervin Guyomar<sup>3,6</sup>, Anne-  
7 Marie Cortesero<sup>7</sup>, Nicole M. van Dam<sup>1,2 \*</sup>

8

9 1. Molecular Interaction Ecology, German Centre for Integrative Biodiversity Research (iDiv) Halle-  
10 Jena-Leipzig, Puschstraße 4, 04103 Leipzig, Germany

11 2. Institute of Biodiversity, Friedrich Schiller University Jena, Dornburger-Str. 159, 07743 Jena,  
12 Germany

13 3. Bioinformatics Unit, German Centre for Integrative Biodiversity Research (iDiv) Halle-Jena-  
14 Leipzig, Puschstraße 4, 04103 Leipzig, Germany

15 4. Institute of Computer Science, Martin Luther University Halle-Wittenberg, Von-Seckendorff-Platz  
16 1, 06120 Halle, Germany

17 5. Department of Insect Symbiosis, Max Planck Institute for Chemical Ecology, Hans-Knöll-Str. 8,  
18 07745 Jena, Germany

19 6. GenPhySE, Université de Toulouse, INRAE, ENVT, 31326, Castanet Tolosan, France

20 7. IGEPP, INRAE, Institut Agro, Univ Rennes, 35000, Rennes, France

21

22 # equal first authors

23 \*corresponding author: Nicole M. van Dam, [nicole.vandam@idiv.de](mailto:nicole.vandam@idiv.de)

24

25

26

27

28

29 **Abstract**

30 Belowground herbivores are overseen and underestimated, even though they can cause significant  
31 economic losses in agriculture. The cabbage root fly *Delia radicum* (Anthomyiidae) is a common pest in  
32 *Brassica* species, including agriculturally important crops, such as oil seed rape. The damage is caused  
33 by the larvae, which feed specifically on the taproots of *Brassica* plants until they pupate. The adults are  
34 aboveground-living generalists feeding on pollen and nectar. Female flies are attracted by chemical cues  
35 in *Brassica* plants for oviposition. An assembled and annotated genome can elucidate which genetic  
36 mechanisms underlie the adaptation of *D. radicum* to its host plants and their specific chemical defenses,  
37 in particular isothiocyanates. Therefore, we assembled, annotated and analyzed the *D. radicum* genome  
38 using a combination of different Next Generation Sequencing and bioinformatic approaches. We  
39 assembled a chromosome-level *D. radicum* genome using PacBio and Hi-C Illumina sequence data.  
40 Combining Canu and 3D-DNA genome assembler, we constructed a 1.3 Gbp genome with an N50 of  
41 242 Mbp and 6 pseudo-chromosomes. To annotate the assembled *D. radicum* genome, we combined  
42 homology-, transcriptome- and *ab initio*-prediction approaches. In total, we annotated 13,618 genes that  
43 were predicted by at least two approaches. We analyzed egg, larval, pupal and adult transcriptomes in  
44 relation to life-stage specific molecular functions. This high-quality annotated genome of *D. radicum* is a  
45 first step to understanding the genetic mechanisms underlying host plant adaptation. As such, it will be  
46 an important resource to find novel and sustainable approaches to reduce crop losses to these pests.

47

48 **Keywords:** belowground pest, herbivory, insects, chromosome-scale genome, de novo genome  
49 assembly, functional gene annotation

50

51

52

53

54

55

56

57 1. INTRODUCTION

58 The cabbage root fly, *Delia radicum* L. (Diptera; Anthomyiidae), is a severe pest in agriculture. The family  
59 Anthomyiidae, or flower flies, is a large family mainly occurring in the northern hemisphere. Adult *D.*  
60 *radicum* flies live aboveground and feed on nectar (Figure 1, (Gouinguene & Städler, 2005; Peter  
61 Roessingh & Städler, 1990)). The females oviposit next to or on the root crown of brassicaceous plants.  
62 After the eggs have hatched, the larvae occupy a new habitat and move into the soil to mine into the tap  
63 roots (Figure 1). After passing through three instars in about 20 days, the larvae move back to the soil  
64 to pupate (Capinera, 2008).

65 As its common name “cabbage root fly” already indicates, *D. radicum* is a specialized herbivore on  
66 Brassicaceae, the cabbage and mustard family. This plant family contains several agriculturally important  
67 crops, such as broccoli, turnip, Pak Choi and rapeseed. Although they are specialists on Brassicaceae,  
68 females prefer some plant species of this family more for oviposition than others (Lamy et al., 2018). The  
69 female flies are attracted to the plant by specific volatile organic compounds, such as sulfides and  
70 terpenes (Ferry et al., 2007; Kergunteuil, Dugravot, Danner, van Dam, & Cortesero, 2015). Upon  
71 contacting the plants, the females decide to oviposit based on chemical cues, in particular the presence  
72 of glucosinolates (Gouinguéné & Städler, 2006). The larvae are well adapted to deal with the  
73 glucosinolate-myrosinase defense system that is specific to the Brassicaceae (Hopkins, van Dam, & van  
74 Loon, 2009). Glucosinolates are sulfur-containing glycosylated compounds, which are stored in the  
75 vacuoles of cells localized between the endodermis and phloem cells (Kissen, Rossiter, & Bones, 2009).  
76 The roots of Brassica species contain high levels of glucosinolates, in particular 2-  
77 phenylethylglucosinolate (van Dam, Tytgat, & Kirkegaard, 2009). Glucosinolates can be converted by  
78 the enzyme myrosinase into pungent and toxic products, such as isothiocyanates (ITCs) and nitriles  
79 which deter generalist herbivores (Kissen et al., 2009). The myrosinase enzymes are stored in so called  
80 myrosin cells (Kissen et al., 2009). Upon tissue damage, either by mechanical damage or by herbivores,  
81 such as *D. radicum* larvae, the glucosinolates and myrosinases mix. This results in the formation of  
82 various conversion products, including ITCs, nitriles and sulfides (Crespo et al., 2012; Danner et al.,  
83 2015; Wittstock & Gershenzon, 2002).

84 Indeed, *D. radicum* larvae can successfully infest the roots of a wide range of Brassicaceae (Finch &  
85 Ackley, 1977; Tsunoda, Krosse, & van Dam, 2017). The damage the feeding larvae cause leads to  
86 substantial fitness loss in wild plants and yield reduction in crops. In rapeseed, *D. radicum* infestation  
87 reduces seed numbers and seed weight (Griffiths, 1991; McDonald & Sears, 1992). The annual  
88 economic losses due to *D. radicum* infestation in Western Europe and Northern America are estimated to  
89 be 100 million \$ (Wang, Voorrips, Steenhuis-Broers, Vosman, & van Loon, 2016).

90 Controlling *D. radicum* in agriculture is a major challenge. Natural resistance to this specialist herbivore  
91 has not been identified in currently used cultivars yet (Ekuere et al., 2005) and several effective synthetic  
92 insecticides, such as neonicotinoids, have been banned from use due to environmental concerns (Allema  
93 B, Hoogendoorn M, van Beek J, & P, 2017). Moreover, pesticide resistance has already developed in  
94 this species, for example against chlorpyrifos (van Herk et al., 2016). Alternative and more sustainable  
95 pest management strategies are urgently needed. Heritable natural resistance to *D. radicum* is present  
96 in wild brassicaceous species, but introgression of these traits may be hampered by crossing barriers  
97 and linkage of resistance with undesired traits (Ekuere et al., 2005; Wang et al., 2016). Several studies  
98 examined the application of entomopathogenic fungi, natural predators or parasitoids, mixed cropping  
99 and soil microbes to better control *D. radicum* (Bruck, Snelling, Dreves, & Jaronski, 2005; Dixon, Coady,  
100 Larson, & Spaner, 2004; Fournet, Stapel, Kacem, Nenon, & Brunel, 2000; Kapranas, Sbaiti, Degen, &  
101 Turlings, 2020; Lachaise et al., 2017; Neveu, Krespi, Kacem, & Nénon, 2000). Even though each of  
102 these measures may reduce *D. radicum* infestations, they cannot prevent yield loss as effectively as  
103 synthetic pesticides.

104 To understand the interaction of *D. radicum* with its host plants, the chemical ecology of this plant-  
105 herbivore interaction has been intensively studied over the last decades. These studies analyzed aspects  
106 ranging from the chemosensory mechanisms of host plant attraction and oviposition choice to herbivore-  
107 induced plant responses and interactions with predators and parasitoids (Ferry et al., 2007; Gouinguene  
108 & Städler, 2005; Hopkins et al., 2009; Kergunteuil et al., 2015; P Roessingh et al., 1992). However, the  
109 genetic mechanisms underpinning host-plant adaptation of *D. radicum* are unknown. An accurate and  
110 well-annotated genome can reveal genetic mechanisms underpinning adaptation of *D. radicum* to its

111 host's chemical defenses. Especially, understanding the preference of the different agricultural relevant  
112 life stages (adults and larvae) which occur in separate habitats (above- and belowground) on the genetic  
113 level expands our understanding of herbivore-plant interactions. These mechanisms can also be an  
114 important starting point to develop novel approaches, such as species-specific dsRNA-based pest  
115 control strategies. So far, a genome of this species has not been published.

116 Here, we assembled and annotated a *de novo*, chromosome-level scaffolded genome of *D. radicum*  
117 using PacBio and Hi-C Illumina sequencing. We used three different approaches to annotate the  
118 genome; Cufflinks, which uses transcript assembly; GeMoMa, which is homology-based, and BRAKER,  
119 for additional prediction of genes not covered by the first two methods. Generated RNASeq data of all  
120 four life stages (eggs, larvae, pupae, adults) and two relevant stress factors (heat stress in adults, plant  
121 toxin stress in larvae), allowed us to validate predicted genes and to identify specific gene families which  
122 were expressed in each of the life stages.

123

## 124 2. MATERIALS AND METHODS

### 125 2.1 Sample material

126 A starting culture of *D. radicum* was provided by Anne-Marie Cortesero, University of Rennes, France in  
127 2014. It originated from pupae collected in a cabbage field in Brittany, France, (48°6'31" N, 1°47'1" W)  
128 the same year. More than five thousand pupae were collected to start the original culture and ~50  
129 individuals from this culture were sent to iDiv. A permanent culture was established in our lab under  
130 constant conditions (20 ± 2°C, 85 ± 10 % RH, 16L:8D) in a controlled environment cabinet (Percival  
131 Scientific, Perry, Iowa, USA) resulting in an inbreeding line of over 60 generations. Adult flies were reared  
132 in a net cage and fed with a 1:1 milk powder-yeast mixture and a water-honey solution, which was  
133 changed three times a week. Water was provided ad libitum. Eggs were placed in a 10x10x10 cm plastic  
134 box filled with 2 cm moistened, autoclaved sand and a piece of turnip. Once the larvae hatched, old  
135 turnip pieces were removed and exchanged with new turnip every other day and the sand was moistened  
136 when necessary. After the third instar, the larvae crawled into the sand, where they pupated. The pupae  
137 were collected by flooding the box with water, collecting the floating pupae and placing them into the  
138 adult fly cage until eclosion.

139 Species identification was performed using a fragment of the cytochrome oxidase I (COI) gene as a  
140 molecular marker generated with the universal COI primer pair HCO and LCO (Folmer et al. 1994). The  
141 sequence was submitted to BLAST online using the BLASTn algorithm (Retrieved from  
142 <https://blast.ncbi.nlm.nih.gov/Blast.cgi>). The top three hits matched with *D. radicum* COI accessions  
143 (MG115888.1, HQ581775.1, GU806605.1) with an identity of more than 98.45 %.

144

## 145 2.2 Genome sequencing

### 146 2.2.1 Sampling, DNA extraction and PacBio sequencing

147 For PacBio sequencing, 18 randomly collected, fully matured *D. radicum* adults were frozen and stored  
148 at -80°C. To sterilize the surface, the flies were incubated for 2 min in bleach (2 %), transferred to sodium  
149 thiosulfate (0.1 N) for neutralization, washed three times in 70 % ethanol and once in autoclaved dd  
150 water. To reduce contamination by microorganisms from the gut, we extracted total DNA from the head  
151 and the thorax of the adults, using a phenol-chloroform extraction method according to the protocol of  
152 the sequencing facility (Figure S1). We pooled three individuals per extraction and checked the DNA  
153 quality using gel electrophoresis (0.7 % agarose gel). DNA purity was assessed using a  
154 NanoPhotometer® P330 (Implen, Munich/Germany) and DNA quantity using a Qubit dsDNA BR assay  
155 kit in combination with a Qubit 2.0 Fluorometer (Invitrogen, Carlsbad, CA/USA). The DNA of all samples  
156 was pooled for the sequencing library. Library preparation and sequencing was provided by the facility  
157 of the Max Planck Institute of Molecular Cell Biology and Genetics, Dresden/Germany on a PacBio  
158 Sequel. A total of 16 SMRT cells were processed and 6,539,960 reads generated. Due to the pooling of  
159 several females and males, we expected the reads to be highly heterozygous, which we considered for  
160 the assembly process.

### 161 2.2.2 Sampling, DNA extraction and Hi-C Illumina sequencing

162 For Hi-C Illumina sequencing fresh *D. radicum* pupae from the above culture were randomly selected. A  
163 total of 10 pupae were chopped into small pieces with a razor and resuspended in 3 ml of PBS with 1%  
164 formaldehyde. The homogenized sample was incubated at RT for 20 min with periodic mixing. Glycine

165 was added to the sample buffer to 125 mM final concentration and incubated at RT for ~15 min with  
166 periodic mixing. The homogenized tissue was spun down (1000 x g for 1 min), rinsed twice with PBS,  
167 and pelleted (1000 x g for 2 min). After removal of the supernatant, the tissue was homogenized to a fine  
168 powder in a liquid nitrogen-chilled mortar with a chilled pestle. Further sample processing and  
169 sequencing was performed by Phase Genomics (Seattle, WA, USA) on an Illumina HiSeq 4000,  
170 generating a total of 181,752,938 paired end reads (2 x 150 bp).

### 171 2.3 Genome size estimation

172 A karyotyping study determined that *D. radicum* is a diploid organism with  $2n = 12$  chromosomes  
173 (Hartman & Southern, 1995). To obtain a reliable estimate of the *D. radicum* genome size, we used flow  
174 cytometry based on a method using propidium iodide-stained nuclei (Spencer Johnston Lab, Texas  
175 A&M, USA; (Hare & Johnston, 2011). The haploid genome sizes were estimated to be  $1239.0 \pm 27.5$   
176 Mbp for females (N = 4) and  $1218.0 \pm 4.0$  Mbp for males (N = 50).

### 177 2.4 Genome assembly and completeness

#### 178 2.4.1 PacBio data processing

179 Raw PacBio reads in bam file format were converted into fasta files by using samtools (version 1.3.1) (Li  
180 et al., 2009) as part of the SMRT link software (version 5.1.0, [https://www.pacb.com/support/software-](https://www.pacb.com/support/software-downloads/)  
181 [downloads/](https://www.pacb.com/support/software-downloads/)). Extracted raw PacBio reads (6,539,960 reads) were checked for potential contaminations  
182 with prokaryotic DNA by applying EukRep (version 0.6.2) (West, Probst, Grigoriev, Thomas, & Banfield,  
183 2018) with default parameter settings. Only reads classified as eukaryotic (4,454,601 reads) were used  
184 for the *de novo* genome assembly.

#### 185 2.4.2 *De novo* genome assembly

186 The long-read assembler Canu (version 1.9) (Koren et al., 2017) was used to generate a *de novo*  
187 genome assembly from contamination-free PacBio reads. The Canu pipeline, including read error  
188 correction and assembly, was started with setting parameters based on the estimated genome size  
189 (genomeSize=1200m) and the use of not too short (minReadLength=5000) and high quality

190 (stopOnReadQuality=true) PacBio reads, addressing the overlapping of sequences  
191 (minOverlapLength=1000 corOutCoverage=200), and accounting for the expected high heterozygosity  
192 rate of the *D. radicum* genome (batOptions=-dg 3 -db 3 -dr 1 -ca 500 -cp 50). The latter parameters were  
193 selected to prevent the haplotypes from being collapsed during the assembly process.

#### 194 2.4.3 Polishing and purging

195 To improve the sequence quality of the raw genome assembly, we performed two rounds of polishing.  
196 All eukaryotic raw PacBio reads were aligned with pbalign (version 0.3.1 and default parameter settings)  
197 and these results were used for sequence polishing with Arrow (version 2.2.2 and default parameter  
198 settings). Both programs are part of the SMRT link software (version 5.1.0,  
199 <https://www.pacb.com/support/software-downloads/>). To detect and remove duplications in the  
200 assembled contigs, we applied purge\_dups (version 1.2.3) (Guan et al., 2020) on the polished assembly.  
201 We ran the first three steps of the purge\_dups pipeline with default parameters and the last step with  
202 additional setting "-e -c" to allow only clipping at the end of contigs and retaining high coverage contigs.

#### 203 2.4.4 Chromosome-scale scaffolding

204 Hi-C Illumina reads were aligned to the purged assembly with the Juicer pipeline incorporating  
205 juicer\_tools (version 1.22.01) (Durand et al., 2016), "-s DpnII" and a restriction site file (generated with  
206 the generate\_site\_positions.py script contained in juicer) provided by "-z" option. The sequences of the  
207 purged assembly were scaffolded with the Juicer output on Hi-C read alignments into chromosome-scale  
208 super-scaffolds applying the 3D-DNA genome assembler (version 18011) (Dudchenko et al., 2017) with  
209 the additional setting of "--splitter-coarse-stringency 30 --gap-size 100". This resulted in the final genome  
210 assembly from *D. radicum*.

#### 211 2.4.5 Evaluating genome completeness

212 We used BUSCO v4 (4.0.5) (Seppey, Manni, & Zdobnov, 2019) to analyze the completeness of the final  
213 and intermediate genome assemblies. Three different gene sets, insecta\_odb10.2019-11-20,  
214 endopterygota\_odb10.2019-11-20, and diptera\_odb10.2019-11-20, representing different levels in



215 evolutionary relatedness were considered in the evaluation process. These three gene sets comprise  
216 1367, 2124, or 3285 orthologous genes, respectively.

#### 217 2.4.6 Exclusion of Hi-C scaffolds

218 While assembling the *D. radicum* genome we co-assembled the complete genome of *Wolbachia* (Hi-C  
219 scaffold 7) a common endosymbiont in arthropods. To obtain a contamination-free final assembly, we  
220 excluded Hi-C scaffolds 7, 146 and 370 and trimmed Hi-C scaffold 6 after position 12,881,041 that were  
221 annotated to be contaminated with *Wolbachia* sequences during the NCBI validation process.

#### 222 2.5 Phylogeny - Comparative genomics based on BUSCOs

223 Phylogenetic analyses were done with BuscoOrthoPhylo  
224 (<https://github.com/PlantDr430/BuscoOrthoPhylo>) which is a wrapper script to concatenate and align  
225 protein sequences, and to construct a phylogenetic tree based on single-copy BUSCO genes. BUSCOs  
226 of the endopterygota\_odb10.2019-11-20 gene set, consisting of 2124 genes, were used as the basis for  
227 the analysis. In the initial phase complete single-copy BUSCO genes which were shared by 10 selected  
228 species (Table 1), were computed. Protein sequences of the shared genes were extracted and  
229 concatenated for each species. MAFFT aligner (version 7.475) (Kato, Misawa, Kuma, & Miyata, 2002)  
230 was run on concatenated FASTA file(s) and finally RAxML (version 8.2.12) (Stamatakis, 2014) with “-  
231 rx\_p\_sub PROTGAMMAWAG” as model and “-b 100” bootstrap steps was used to reconstruct the  
232 phylogenetic tree. The resulting findings were visualized in a phylogenetic tree using Phylo.io (Robinson,  
233 Dylus, & Dessimoz, 2016).

#### 234 2.6 Sampling, RNA extraction and Transcriptome sequencing

235 All life stage samples were collected from the laboratory culture (section 2.1). We used three replicates  
236 per life stage and condition. For the egg stage, we collected 25 mg eggs (laid within 24 h) per replicate.  
237 For the larval stage, we collected 18 randomly selected second instar larvae. Nine of the selected larvae  
238 were fed on a semi-artificial diet, containing yeast, milk powder, freeze dried turnip, agar (2:2:2:1) and  
239 90% water. The other nine larvae were reared on the same diet containing 0.4 mg phenylethyl

240 isothiocyanate/g diet. All larvae received freshly prepared diet every other day. After 7 days, larvae were  
241 shock-frozen at -80°C and pooled into batches containing 3 larvae forming three biological replicates per  
242 treatment. For the pupal stage, we randomly selected nine freshly formed pupae and pooled them into  
243 three biological replicates of three pupae each. For the adult stage, we collected 18 fully developed  
244 random adults. Nine individuals were exposed to 35°C (Michaud, Marin, Westwood, & Tanguay, 1997)  
245 for 2 hours, whereas the control adults were kept under normal conditions. We pooled three adults for  
246 one replicate, resulting in three replicates for control and elevated temperature treatment.

247 All samples were surface sterilized using the same procedure as described for the adult flies. We  
248 extracted the total RNA of the larval stage using ReliaPrep RNA Tissue Miniprep kit (Promega, Madison,  
249 WI/USA) according to the supplier's recommended protocol. Total RNA of all further samples was  
250 extracted using TRIzol (Life technologies, Carlsbad, CA/USA) according to the supplier's recommended  
251 protocol. Qualitative and quantitative RNA assessment of all samples was done by gel electrophoresis  
252 (1% agarose), a NanoPhotometer® P330 (Implen, Munich/Germany) and a Qubit 2.0 (Invitrogen,  
253 Carlsbad, CA/USA).

254 Library preparation and sequencing of the larval samples (control and stressed larvae) were performed  
255 by the Deep Sequencing group of Biotech TU Dresden/Germany on an Illumina NextSeq next generation  
256 sequencer. The poly(A) enriched strand specific libraries generated for all samples ran on one lane  
257 generating in total 400 Mio of 75 bp paired end reads. Egg, pupal and adult (control and stressed)  
258 samples were sequenced by Novogene (Hong Kong/China) with strand specific library preparations and  
259 sequencing on an Illumina NovaSeq 6000 next generation sequencer, generating 20 Mio paired-end (2  
260 x 150 bp) reads per sample.

261

262 2.7 Genome annotation – prediction of protein-coding genes

263 2.7.1 Mapping of Transcriptome data

264 Including RNASeq data can improve the quality of gene predictions as optional input by several gene  
265 prediction algorithms. We mapped the *D. radicum* RNASeq data of the 18 samples, consisting of six

266 conditions (4 life stages and 2 stress treatments) with three replicates each to the *D. radicum* genome  
267 with STAR (version 020201) (Dobin et al., 2012) and store mapping results in bam files.

## 268 2.7.2 Homology-based gene prediction

269 Homology-based GeMoMa (version 1.6.4 und 1.7.2) (Keilwagen, Hartung, Paulini, Twardziok, & Grau,  
270 2018; Keilwagen et al., 2016) gene predictions the *D. radicum* genome were performed based on the  
271 annotated genomes of four Diptera species (*Anopheles gambiae*, *Drosophila melanogaster*, *Lucilia*  
272 *cuprina*, and *Musca domestica*), four Lepidoptera species (*Manduca sexta*, *Pieris rapae*, *Plutella*  
273 *xylostella*, and *Spodoptera litura*), and one Coleoptera species (*Tribolium castaneum*) obtained from  
274 NCBI (Table 1). For each of these nine species, extracted CDS were aligned with MMseqs2 (version  
275 11.e1a1c) (Steinegger & Söding, 2017) to the *D. radicum* genome sequence with parameter values  
276 suggested by GeMoMa. Alignments and RNASeq mappings were used for predictions of gene models  
277 in the genome with GeMoMa and default parameters, separately for each species and by incorporating  
278 mapped RNASeq data for refining intron boundaries. The resulting nine gene annotation sets were  
279 filtered and merged using the GeMoMaAnnotationFilter (GAF) with "f="start=='M' and stop=='\*' atf=""".  
280 Only transcripts of genes starting with the start codon "M(ethionine)" and ending with a stop codon "\*" were  
281 considered and all isoforms were retained. We finally predicted and added UTR annotations to the  
282 resulting filtered set of transcripts by using the GeneAnnotationFinalizer with "u=YES rename=NO",  
283 which is also part of the GeMoMa suite.

## 284 2.7.3 Transcriptome assembly - RNA-Seq-based gene predictions

285 To assemble one transcriptome per life stage and condition, we merged the read mappings (bam files)  
286 of the three replicates per condition and life stage. For the transcriptome assembly of the mapped  
287 RNASeq data, we used Cufflinks (version 2.2.1) (Trapnell et al., 2010). Initially, soft-clipped read  
288 mappings were clipped, and assembled to six transcriptomes using Cufflinks with default parameters  
289 and "-fr-firststrand". The resulting six transcriptomes were subjected to Cuffmerge, which is part of the  
290 Cufflinks toolbox, to generate a single master transcriptome. While Cufflinks assembled transcripts with  
291 exon annotation, missing coding regions and UTRs were identified with TransDecoder (version 5.5.0,

292 <https://github.com/TransDecoder/TransDecoder>). Finally, predicted transcripts were filtered for a proper  
293 start and end of protein coding transcripts and retaining the UTR annotations by applying the GAF with  
294 parameters "f="start=='M' and stop=='\*'" atf=" at= true tf= true".

#### 295 2.7.4 *Ab initio* gene prediction

296 Additionally, we aimed to predict genes not covered by the homology-based and the transcriptome-  
297 based approach, due to a lack of homology or because of no or low expression under the specific  
298 conditions of the sampled life stages. To obtain such *ab initio* gene predictions, we ran RepeatMasker  
299 (version 4.1.0, <http://www.repeatmasker.org>) with RMBlast (version 2.10.0,  
300 <http://www.repeatmasker.org/RMBlast.html>) and "-species insecta -gff -xsmall" to find and mask  
301 repetitive sequences annotated for insects in the RepeatMasker repeat database. For *ab initio* prediction  
302 of protein-coding genes on the masked genome sequences, we ran BRAKER (version 1.9) (Brůna, Hoff,  
303 Lomsadze, Stanke, & Borodovsky, 2021; Katharina J. Hoff, Lange, Lomsadze, Borodovsky, & Stanke,  
304 2015; Katharina J Hoff, Lomsadze, Borodovsky, & Stanke, 2019), which combines GeneMark (version  
305 4.59\_lic) (Lomsadze, Burns, & Borodovsky, 2014) and AUGUSTUS (version 3.4.0) (Stanke, Schöffmann,  
306 Morgenstern, & Waack, 2006) with "--gff3 --softmasking" and provided the mapped RNASeq data as  
307 hints for initial training of gene models and gene predictions.

308 Predicted transcripts were filtered for proper start and end of protein coding transcripts by applying the  
309 GAF with "f="start=='M' and stop=='\*'" atf="". Finally, UTR annotations were predicted and added using  
310 GeneAnnotationFinalizer with "u=YES rename=NO".

#### 311 2.7.5 Final genome annotation and completeness evaluation

312 We ran GeMoMa's GeMoMaAnnotationFilter (GAF) with "f=" atf=" tr= true at= true" to integrate the  
313 predicted gene models from all three applied approaches, the homology-based, the RNASeq-based and  
314 *ab initio* gene prediction approach, and yield a master gene annotation file for the *D. radicum* genome.  
315 As gene-related features we include mRNA, CDS, five\_prime\_UTR, and three\_prime\_UTR specificities

316 in the annotation file and several attributes that gave additional information on the predicted transcripts  
317 and can be used for user-specific filtering.

318 We evaluated the completeness of the final set of protein-coding genes with BUSCO v4 as we did for  
319 the evaluation of the completeness of the genome (section 2.4.5), but set "-m proteins".

## 320 2.8 Functional annotation

321 Predicted *D. radicum* protein sequences were subjected to PANNZER2 (Protein ANnotation with Z-  
322 scoRE) (Törönen, Medlar, & Holm, 2018), which predicts functional descriptions and GO classes.  
323 Additionally, extracted protein sequences were subjected to InterProScan (version 5.45-80.0.) (Blum et  
324 al., 2020; Jones et al., 2014) and scanned for information on protein family and domains in all member  
325 data bases (-appl CDD, HAMAP, PANTHER, Pfam, PIRSF, PRINTS, ProDom, PROSITEPATTERNS,  
326 SMART, TIGRFAM, Gene3D, SFLD, SUPERFAMILY, MobiDBLite) and for GO- or pathway annotation  
327 ("-goterms -iprlookup -pa").

328 GO terms annotated for transcripts with PANNZER2 and InterProScan were merged. Additionally, to get  
329 a functional annotation per gene, we merged the annotations of all respective transcripts.

## 330 2.9 Synteny analysis

331 Annotated CDSs of *D. melanogaster* (Table 1) were extracted and aligned to the *D. radicum* genome  
332 with MMseqs2 (version 11.e1a1c) (Steinegger & Söding, 2017). Alignments were used for homology-  
333 based predictions of gene models in the *D. radicum* genome with GeMoMa (version 1.6.4) (Keilwagen  
334 et al., 2018) with default parameters. Predicted gene models were filtered using the  
335 GeMoMaAnnotationFilter (GAF) with "f="start=='M' and stop=='\*' atf=""". Finally, a table containing the  
336 relation and positions of the gene models was generated with SyntenyChecker, which is part of the  
337 GeMoMa toolbox. Syntenic relationships of *D. radicum* to *D. melanogaster* were visualized using Circos  
338 (version 0.69-9) (Krzywinski et al., 2009).

## 339 2.10 Analysis of life cycle data

340 We extracted the sequences of all annotated transcripts and quantified their abundances with kallisto  
341 (version 0.46.1, (Bray, Pimentel, Melsted, & Pachter, 2016)) with “-b 100” bootstraps and “—rf-stranded”.  
342 The abundances were imported into the statistical framework R (version 3.6.2) (R Core Team, 2020) for  
343 further analyses using the R package tximport (1.14.2) (Soneson, Love, & Robinson, 2015). Using  
344 tximport transcript-level, estimates for abundances were summarized for further gene-level analyses.

345 We denoted a gene as *expressed* if it had a TPM (transcript per million) value  $\geq 1$  in at least one of the  
346 18 transcriptome samples. We refer to this set of genes as the “data set of expressed genes”. We called  
347 a gene present in a life stage or condition if it occurred in at least one replicate. This aggregation resulted  
348 in a matrix with six columns (four life stages, two conditions). These six sets were analyzed for life stage  
349 and condition-specific gene expression and also for intersections with the R package UpSetR (1.4.0)  
350 (Gehlenborg, 2019).

351 We performed Gene Ontology (GO) analyses of pre-defined gene sets using R (version 4.0.4) with the  
352 latest version of the R package topGO (2.42.0) (Alexa & Rahnenfuhrer, 2020) with GO.db (3.12.1)  
353 (Carlson, Falcon, Pages, & Li, 2020). We used Fisher’s exact test to identify over-represented GO terms.  
354 Raw p-values were corrected for multiple testing using the method proposed by Benjamini and Yekutieli  
355 (Benjamini & Yekutieli, 2001) implemented in p.adjust contained in the basic R package stats. To get an  
356 indication of which processes were active, we aggregated single significant GO-terms (adjusted p value  
357  $< 0.05$ ) into self-assigned generic categories. Results were visualized using the R package pheatmap  
358 (1.0.12) (Kolde, 2019). For visualization of the results for generic categories, we computed the relative  
359 frequency of GO terms determined in a pre-defined gene set for a generic category. The relative  
360 frequency was calculated by the number of significant GO terms in a gene set divided by the total number  
361 of GO terms that were sorted into the appropriate generic category.

362 We defined six gene sets for life stage (eggs, larva, pupa, adults) and condition-specific GO analysis  
363 (ITC, heat stress). For the analysis of the whole life cycle we determined genes that were exclusively  
364 expressed in one of the four life stages under control conditions. As we have additional stress conditions  
365 in the larval and the adult life stage, we extended the defined gene sets for these two life stages by

366 genes contained in the intersection of both conditions (control and stress) within these stages. For  
367 condition-specific GO analysis, we additionally determined the genes exclusively expressed in the  
368 stressed condition of the larval and adult stage, respectively. Again, we also extended the stress-specific  
369 genes sets by the respective intersection gene set.

370 We clustered samples and genes contained in the data of expressed genes using the R package umap  
371 (0.2.7.0) (Konopka, 2020). UMAP (uniform manifold approximation and projection) is a technique to  
372 reduce dimensions and bring similar data vectors, samples (columns) or genes (rows) in close proximity.  
373 In our analyses we projected the data vectors in both cases in a two-dimensional space and tested  
374 different values for the size of the neighborhood (`n_neighbors`) and the minimal distance (`min_dist`)  
375 between data points (either samples or genes).

376

### 377 3 RESULTS AND DISCUSSION

#### 378 3.1 Genome assembly

379 PacBio reads classified as eukaryotic (4,454,601 reads) were used for a contamination-free assembly  
380 of the *D. radicum* genome with Canu. We expected a high heterozygosity rate due to the pooling of  
381 multiple *D. radicum* individuals. Setting Canu parameters accordingly to prevent haplotypes from being  
382 collapsed during the assembly process, resulted in a raw assembly with the length of approximately  
383 2.538 Gbp, which was nearly twice the size of the expected genome, an N50 contig of approximately  
384 205.3 Kbp and in total 29,244 contigs (Table 2). By evaluating the completeness of the raw genome  
385 assembly with BUSCO (using three different sets of orthologous genes at different levels of evolutionary  
386 relatedness), the raw assembly revealed a completeness of at least 95.7 % for the Diptera (Figure 2b,  
387 Table S1) and for more than 98 % for the Endopterygota gene set (Table S2). These results showed a  
388 high completeness of the raw assembly, but also the existence of a reasonable percentage of duplicated  
389 sequences.

390 Improving the sequence quality of the raw genome assembly by performing two rounds of polishing with  
391 Arrow, increased not only the size of the assembly to approximately 2.544 Gbp (Table 2), but also the  
392 completeness of the *polished* assembly. Especially the percentage of complete genes in the BUSCO  
393 Diptera gene set increased to more than 97 %. Simultaneously, the number of duplicated genes  
394 increased (Figure 2b, Table S1).

395 Next, removing duplicated sequences in the polished assembly with `purge_dups` successfully reduced  
396 the size of the assembly to approximately 1.326 Gbp and a total of 7,014 contigs with an N50 of nearly  
397 656.5 Kbp. The size of the *purged* assembly was already close to the experimentally determined genome  
398 size. By evaluating the completeness of the purged assembly, we observed a strong reduction in the  
399 percentage of duplicated genes, for the Diptera gene set to 6.1 % (Figure 2b, Table S1). As a side effect  
400 of removing sequences, the completeness of the gene sets dropped slightly to 93.5 % (Figure 2b, Table  
401 S1).

402 For the final *chromosome-scale* assembly, we scaffolded the contigs of the purged assembly with Hi-C  
403 data using Juicer and the 3D-DNA genome assembler. The resulting assembly comprised six  
404 chromosome-scale contigs (Figure 2a, Table S3), which was consistent with the number of  
405 chromosomes determined by karyotyping (Hartman & Southern, 1995), and 2,981 smaller, not-  
406 assembled contigs. The final assembly of the *D. radicum* genome yielded approximately 1.326 Gbp,  
407 where 96.67 % of the bases (nearly 1.281 Gbp) were anchored to the six pseudo-chromosomes. The  
408 size of the six pseudo-chromosomes ranged from one small chromosome with 13 Mbp to five larger  
409 chromosomes between 209 and 328.5 Mbp (Table S3). This is in line with the karyotype of *D. radicum*,  
410 which comprises five large and one much smaller chromosome (3.3 % of the large chromosomes' size)  
411 (Hartman & Southern, 1995).

412 Validation of the final assembly with BUSCO (Table S1, S2) showed no considerable change in the  
413 number of complete genes, but the number of single-copy genes increased to 92.2 % (3,030 genes)  
414 while the number of duplicated genes decreased to 1.2 % (40 genes) for the Diptera gene set. The six  
415 pseudo-chromosomes along with the small contigs were used for all further analyses and are referred to



416 as the *D. radicum* genome hereafter. The number of single-copy BUSCOs of the Diptera gene set in the  
417 *D. radicum* genome, was similar to those of other Diptera genomes (Figure 2c, Table S4), indicating that  
418 the chromosome-scale genome assembly of *D. radicum* was of comparable quality. Based on our  
419 findings, we can conclude that the final *D. radicum* chromosome-scale assembly was accurate, complete  
420 and without prokaryotic contamination.

## 421 3.2 Phylogeny and synteny

422 To examine the phylogenetic relationship of *D. radicum* to other insects, we compared complete single-  
423 copy BUSCOs of the Endopterygota gene set (comprising totally 2,124 genes) shared by the selected  
424 nine insect species belonging to Diptera (4), Coleoptera (1) and Lepidoptera (4, Table 1). We identified  
425 1,217 (Table S5, Table S6) shared, and therefore conserved, single-copy genes (Figure 3a, Table S5).  
426 Reconstruction of the evolutionary relationships among these ten species based on the shared gene  
427 sets revealed that the root fly *D. radicum* was most closely related to the blow fly, *L. cuprina*, followed by  
428 the house fly, *M. domestica*, and the fruit fly, *D. melanogaster* (Figure 3a). These relations were  
429 consistent with their taxonomic position (Wiegmann et al., 2011).

430 In our synteny analysis, we successfully mapped the six pseudo-chromosomes of *D. radicum* to the six  
431 chromosomes of *D. melanogaster* (Figure 3b). This was achieved by predicting gene models (Table 1)  
432 in the *D. radicum* genome based on the annotated *D. melanogaster* genome using GeMoMa (Table S7).  
433 Genes annotated on the X chromosome of *D. melanogaster* mapped successfully on the second largest  
434 chromosome (HiC\_scaffold\_2) in the *D. radicum* assembly. Genes annotated for the other *D.*  
435 *melanogaster* chromosomes were mainly localized on the remaining four larger *D. radicum*  
436 chromosomes (Figure 3b). For the smallest chromosome (HiC\_scaffold\_6) we found indications that this  
437 might be related to chromosome 4 (NC\_004353.4) of *D. melanogaster* (Table S7).

## 438 3.3 Genome annotation and functional gene annotation

### 439 3.3.1 Process of genome annotation and evaluation

440 We sequenced the transcriptomes of all four life stages (eggs, larvae, pupae, and adults) of *D. radicum*,  
441 and included two stress factors (heat stress on adults and plant toxin on larvae) that are relevant for the  
442 survival of *D. radicum* to support the prediction of a comprehensive set of protein-coding genes in the *D.*  
443 *radicum* genome.

444 Our homology-based protein-coding gene prediction with GeMoMa relied on nine already sequenced  
445 and annotated genomes of phylogenetically related species, herbivore species sharing the same host  
446 plant range or common pests on crop plants or stored grains (Table 1). We predicted 19,343 protein-  
447 coding genes comprising 46,286 transcripts (Table 3) having a homologue in at least one of the nine  
448 selected species.

449 As a complementary approach, we assembled the transcriptomes of all life stages from egg to adult,  
450 plus adults and larvae subjected to two stage-related stress factors using Cufflinks. From the pure  
451 RNASeq-based transcriptome data, we were able to predict 16,188 protein-coding genes covering  
452 23,729 transcripts (Table 3) that were expressed at the sampled time points of the different life stages.

453 To cover the hitherto non-annotated and not or low expressed *D. radicum*-specific genes under our  
454 conditions, we performed *ab initio* gene prediction. A total of 81,150 genes yielding 82,473 transcripts  
455 were predicted (Table 3). Similarly, as before, we retained all predicted genes, to allow future users the  
456 option to choose their own filtering criteria in later studies.

457 The integration of the predictions of all three approaches into a comprehensive annotation led to 81,000  
458 putative genes covering 121,731 transcripts (Table 3), where a relatively high number of putative genes  
459 was predicted specifically by the *ab initio* approach (Figure 4a). Nearly 95.5 % of the genes were located  
460 on the six chromosomes (Table S3).

461 Evaluation with BUSCO showed that our genome annotation covered 93.6 % complete-copy genes of  
462 the Diptera gene set, and 95.4 % of the Endopterygota gene set (Table S8). By determining the overlap  
463 of the predictions, we found 7,129 genes that were predicted by all three approaches and a total of  
464 13,264 genes by at least two approaches (Figure 4a). The annotation of the latter set of genes covered

465 87.5 % of complete-copy genes of the Diptera gene set and 89.5 % of the Endopterygota gene set (Table  
466 S8). Only the combination of all three approaches led to a complete annotation of the *D. radicum*  
467 genome.

### 468 3.3.1 Functional annotation

469 Overall, 77.1 % (62,418) of the genes were functionally annotated with at least one GO-term and/or  
470 protein family or domain information (Figure 4b, Figure S2, Table S9), including 71.15 % (42,244) of the  
471 only *ab initio* predicted genes.

472 Focusing on the expressed genes by using our in-house whole life stage RNASeq data, we found a  
473 reasonable number of 30,492 genes (37.64 %) having an estimated expression of  $\geq 1$  transcript per  
474 million (TPM) (Figure 4c). A high number of genes was predicted by BRAKER only, but most of these  
475 genes were not expressed under our conditions, although the number of expressed genes is higher than  
476 in the other sets (Figure 4c). From the set of expressed genes, 50 % (15,270) were functionally annotated  
477 with at least one GO-term (Figure 4d).

478 Taken together, these findings indicate that our gene annotation is complete and accurate. We will  
479 demonstrate its applicability to generate biologically relevant information in the following section, where  
480 we analyzed the transcriptomes of all life stages of *D. radicum* to identify life stage-specific functional  
481 gene expression underlying adaptations to their stage-specific life styles, especially to their host plants.

### 482 3.4 The *D. radicum* life cycle

483 An unsupervised clustering analysis of the expressed gene set with UMAP showed a high similarity of  
484 samples belonging to the same life stage (larva or adult, Figure 5a), even if they were subjected to  
485 different conditions (control and stressed). We also found that all samples of the egg and pupal stage  
486 clustered together. This seems logical, considering that the egg and pupal life stages both undergo  
487 considerable morphological and physiological transformation processes, and, in contrast to larvae or  
488 adults, are less involved with digestive, locomotory, gustatory and olfactory processes.

489 We also found that the total number of expressed genes differed among life stages (Figure 5b). The  
490 lowest total number of expressed genes was detected in the egg stage and the highest in the larval and  
491 pupal stages (Figure 5b, horizontal bar plot). When looking at the overlap among the life stages, we  
492 found 31.6 % of the 30,492 genes to be expressed across all life stages (Figure 5b, vertical bar plot).  
493 Another 36 % of the genes were exclusively expressed in either a single life stage or condition, in the  
494 intersection of both conditions of the larval and the adult stage, respectively or specific in egg and pupal  
495 stage (Figure 5b, Figure S3). In the UMAP plot (Figure 5c), genes expressed in single life stages were  
496 located at the top and formed life stage-specific spots, whereas genes expressed in all life stages also  
497 clustered but were located on the opposite side. The remaining one-third of the genes (not shown in  
498 Figure 5b, Figure S3) clustered in between. For larval or adult stages, we observed that genes expressed  
499 under different conditions clustered closely together and formed life stage-specific clusters (Figure 5c).

500 An ontology-based gene expression analysis revealed life-stage specific groups related to biological  
501 processes (BP), molecular functions (MF) and cellular components (CC, Figure 6, Figure S4, Table  
502 S10). In the egg stage, mainly genes involved in the embryonic development (BP), transcriptomic  
503 activity (MF) and genetic material (CC, Figure 6) were expressed. Especially genes belonging to the  
504 GO biosynthetic processes DNA biosynthesis, metabolic processes, egg shell layer formation  
505 (amnioserosa formation) and organ development (muscle and organ formation) were expressed  
506 (Figure S4a). These processes are involved in the transition from embryo to larva, which requires  
507 active cell division and involves a broad range of metabolic processes to synthesize cell components,  
508 membranes and organs (Beutel, Friedrich, Yang, & Ge, 2013). These structures require different  
509 macromolecules; indeed we found several expressed genes related to molecular biosynthesis  
510 processes in the eggs (Figure S4a). Cell differentiation and organ formation require regulation,  
511 coordination and binding activation (Izumi, Yano, Yamamoto, & Takahashi, 1994) which was reflected  
512 in our BP expression data (Figure 6, Figure S4a).

513 Genes involved in the body development (BP), structural and transposase (MF), and extracellular matrix  
514 (CC) were more frequently expressed in pupae (Figure 6). These genes belong to GOs comprising  
515 regulators, binding activity, biosynthesis, metabolism and DNA amplification (Figure S4). During the

516 pupal stage, metamorphosis results in the 'disassembly' of larval structures to form adult wings,  
517 compound eyes and legs (Buszczak & Segraves, 2000; Chapman & Chapman, 1998). This requires the  
518 expression of genes involved in catabolic processes, as well as in organ and cuticle formation. Indeed,  
519 we found an increased expression of genes responsible for nuclease and peptidase activity (MF) and  
520 chitin-based cuticle structures (CC, Figure 6, S4). This is in line with the gene expression profiles in *D.*  
521 *melanogaster* pupae (Arbeitman et al., 2002).

522 Genes connected to the metabolic processes (BP) were highly expressed in the larval stage (Figure 6).  
523 We found genes coding for peptidases and polymerases (MF), involved in DNA processes or functions  
524 and biosynthetic processes (BF) to be highly expressed (Figure 6, Figure S4). These genes are likely  
525 related to feeding and digestion as well as to growth and molting, which are the main processes in the  
526 larval stage (Chapman & Chapman, 1998; Chen, 1966). In larvae exposed to the plant toxin ITC, we  
527 found that peptidase genes (MF) and genes involved in metabolic and biosynthetic processes (BP)  
528 were activated (Figure 6, Figure S4). These enzymes may be involved in catabolizing plant toxins as  
529 has been described for other herbivores feeding on *Brassica* plants (Schramm, Vassão, Reichelt,  
530 Gershenzon, & Wittstock, 2012).

531 Genes coding for the detection of visible and UV-light, optomotor capability, detection of chemical  
532 stimuli (taste, smell) and temperature (BP) were exclusively expressed in adults (Figure 6, Figure S4a).  
533 The expression of these gene sets, which are involved in the sensory, optomotor and nervous systems  
534 (BP), are important to localize food sources and suitable hosts for oviposition (Gouinguene & Städler,  
535 2005; Gouinguene & Städler, 2006; Peter Roessingh & Städler, 1990). In addition, several genes  
536 coding for receptors and ion channels were expressed (Figure 6, MF). These genes are involved in the  
537 detection of environmental stimuli and signal transmission via the nervous cells to the brain (Sato &  
538 Touhara, 2008). Specific for the adult life stage were also the expression of adult behavior linked  
539 genes (Figure S4a).

540 Exposing adult flies to a higher temperature resulted in the enhanced expression of peptidases, ion  
541 binding (MF), sensory system, especially smell and egg formation (BP) related genes compared to  
542 control adults (Figure 6, Figure S4). High temperatures alter protein stability, structures and folding,

543 followed by functional changes (Jaenicke et al., 1990). The activation of peptidases might avoid  
544 malfunction of proteins under heat stress. Temperature changes affect also the volatility of volatile  
545 organic compounds (VOCs) as well as the emission rates of plants (Copolovici & Niinemets, 2016).  
546 Since adults of *D. radicum* are attracted by VOCs to localize host plants (Finch, 1978), the enhanced  
547 expression of genes related to VOC perception (smell) in flies might indicate towards an adaptive  
548 response. Investing in offspring, under these circumstances might ensure the survival for the fly  
549 population, and to localize a possible host plant for their oviposition, *D. radicum* females utilize odor  
550 signals (Nottingham, 1988).

551

#### 552 4 Conclusion

553 An increasing number of assembled and annotated insect genomes have been published over the last  
554 decade. However, genomes of belowground insects and especially root-feeding herbivores are  
555 underrepresented. We sequenced the genome of a belowground-feeding agricultural pest, the cabbage  
556 root fly *Delia radicum*, whose larvae are also used as a 'model' belowground herbivore in studies on  
557 optimal defense allocation and systemic induced responses in plants. Using PacBio and Hi-C  
558 sequencing, we generated a 1.3 Gbp assembly with an N50 of 242 Mbp, 6 pseudo-chromosomes and  
559 13,618 annotated genes using homology-, transcriptome- and model-predicted approaches, predicted  
560 by at least two approaches. During the assembly process, we identified a co-assembled *Wolbachia*  
561 species, a very common endosymbiont in insects (Werren & Windsor, 2000). The *Wolbachia* genome  
562 consisted of a single contig of 1.59 Mbp matching to the size of the *Wolbachia* supergroups A and B  
563 (~1.4 - 1.6 Mbp) which are typical for arthropods (Lo, Casiraghi, Salati, Bazzocchi, & Bandi, 2002). Such  
564 co-assembled endosymbiont genomes can be valuable to understand host-symbiont interactions and  
565 their roles in other interactions such as host-plant adaptations.

566 Our accurate and well-annotated genome can reveal genetic mechanisms underpinning adaptation of  
567 *D. radicum* to its host plants and their specific chemical defenses, the glucosinolate-isothiocyanate  
568 system. With our work we provide a tool to understand how the different life stages of this herbivore have  
569 adapted to their host plants by identifying adult-specific genes involved in olfactory orientation or the

570 detoxification of plant defense compounds in larvae. The genome and the transcriptomes can further be  
571 used to understand adaptation to specific conditions, i.e. the evolution of pesticide resistance and  
572 adaptive responses to environmental stress factors, such as temperature increase or soil pollution. This  
573 high-quality genome is also an important tool to develop novel strategies to combat this pest, for example  
574 highly specific dsRNA-based pesticides, which can discriminate between target and non-target species.  
575 Moreover, the genus *Delia* contains several other pest species, such as the turnip root fly *D. floralis*, the  
576 onion fly *D. antiqua* and the seed bulb maggot, *D. platura*. As their common names indicate, they attack  
577 a range of agricultural crops. The genome of *D. radicum* is an excellent foundation to further explore the  
578 genetic mechanisms underlying adaptation to chemical host-plant defenses among member of the genus  
579 *Delia*.

580

#### 581 Acknowledgements

582 We thank the Long Read Team of the DRESDEN-concept Genome Center, DFG NGS Competence  
583 Center, part of the Center for Molecular and Cellular Bioengineering (CMCB), Technische Universität  
584 Dresden and the MPI-CBG, especially Sylke Winkler for their great support and the collaboration.  
585 Dominik Jakob is acknowledged for his assistance with the insect culture. Great thanks to Denis Tagu  
586 and Fabrice Legeai (INRAE, Rennes, France), Denis Poinot (University of Rennes, France) and  
587 Ekaterina Shelest (BIU, iDiv, Leipzig, Germany) for their helpful advice and encouragement in earlier  
588 stages of this project. We also greatly thank Jens Keilwagen (JKI, Quedlinburg) for valuable discussions  
589 on gene prediction and support on GeMoMa.

590

#### 591 Funding

592 This research was funded by the German Research Foundation (DFG) Collaborative Research Center  
593 1127 ChemBioSys (project number 09161509) to RS and NvD, and the German Centre for Integrative  
594 Biodiversity Research (iDiv) funded by DFG, grant number- FZT 118, 202548816) to RS, YP, CG, and  
595 NvD. HV and YO thank the Max-Planck-Gesellschaft for funding.

596

597 Author Contributions

598 YP, RS, ND designed the project, AC provided the starting culture of the insects, RS, HV performed the  
599 laboratory work, YP, CG, YO, HV performed the data processing and analysis, YP created the figures,  
600 YP, RS, ND, HV wrote a first version. All authors contributed to the writing process.

601

602 Data Availability Statement

603 Genome sequences and raw data used for genome assembly (PacBio sequences and Illumina Hi-C  
604 sequences) and annotation (Illumina RNASeq sequences) will be available at NCBI. Final genome  
605 annotation, respective annotations by GeMoMa, Cufflinks and BRAKER, and functional transcript  
606 annotations made by InterProScan and PANNZER2 will be available via Zenodo.

607

608 ORCID

609 Rebekka Sontowski: 0000-0001-5791-8814

610 Yvonne Poeschl: 0000-0002-6727-6891

611 Yu Okamura: 0000-0001-6765-4998

612 Heiko Vogel: 0000-0001-9821-7731

613 Cervin Guyomar: 0000-0003-2707-2541

614 Nicole M. van Dam : 0000-0003-2622-5446

615

616 References

617 Alexa, A., & Rahnenfuhrer, J. (2020). topGO: enrichment analysis for gene ontology. *R package*  
618 *version, 2.42.0(0)*.

619 Allema B, Hoogendoorn M, van Beek J, & P, L. (2017). *Neonicotinoids in European agriculture. Main*  
620 *applications, main crops and scope for alternatives*. . Retrieved from Culemborg, The  
621 Netherlands:

622 Arbeitman, M. N., Furlong, E. E. M., Imam, F., Johnson, E., Null, B. H., Baker, B. S., . . . White, K. P.  
623 (2002). Gene Expression During the Life Cycle of *Drosophila melanogaster*. *Science*,  
624 297(5590), 2270-2275. doi:10.1126/science.1072152

625 Benjamini, Y., & Yekutieli, D. (2001). The control of the false discovery rate in multiple testing under  
626 dependency. *Annals of statistics*, 1165-1188.

627 Beutel, R. G., Friedrich, F., Yang, X.-K., & Ge, S.-Q. (2013). *Insect morphology and phylogeny: a*  
628 *textbook for students of entomology*: Walter de Gruyter Berlin/Boston.



- 629 Blum, M., Chang, H.-Y., Chuguransky, S., Grego, T., Kandasamy, S., Mitchell, A., . . . Finn, R. D. (2020).  
630 The InterPro protein families and domains database: 20 years on. *Nucleic acids research*,  
631 49(D1), D344-D354. doi:10.1093/nar/gkaa977
- 632 Bray, N. L., Pimentel, H., Melsted, P., & Pachter, L. (2016). Near-optimal probabilistic RNA-seq  
633 quantification. *Nature biotechnology*, 34(5), 525-527. doi:10.1038/nbt.3519
- 634 Bruck, D. J., Snelling, J. E., Dreves, A. J., & Jaronski, S. T. (2005). Laboratory bioassays of  
635 entomopathogenic fungi for control of *Delia radicum* (L.) larvae. *Journal of invertebrate*  
636 *pathology*, 89(2), 179-183. doi:<https://doi.org/10.1016/j.jip.2005.02.007>
- 637 Brůna, T., Hoff, K. J., Lomsadze, A., Stanke, M., & Borodovsky, M. (2021). BRAKER2: automatic  
638 eukaryotic genome annotation with GeneMark-EP+ and AUGUSTUS supported by a protein  
639 database. *NAR Genomics and Bioinformatics*, 3(1). doi:10.1093/nargab/lqaa108
- 640 Buszczak, M., & Segraves, W. A. (2000). Insect metamorphosis: Out with the old, in with the new.  
641 *Current Biology*, 10(22), R830-R833. doi:[https://doi.org/10.1016/S0960-9822\(00\)00792-2](https://doi.org/10.1016/S0960-9822(00)00792-2)
- 642 Capinera, J. L. (2008). *Encyclopedia of entomology* (2nd edition ed.): Springer Science & Business  
643 Media.
- 644 Carlson, M., Falcon, S., Pages, H., & Li, N. (2020). GO. db: A set of annotation maps describing the  
645 entire Gene Ontology. *R package version*, 3.12.1(0).
- 646 Chapman, R. F., & Chapman, R. F. (1998). *The insects: structure and function*: Cambridge university  
647 press.
- 648 Chen, P. S. (1966). Amino Acid and Protein Metabolism in Insect Development. In J. W. L. Beament, J.  
649 E. Treherne, & V. B. Wigglesworth (Eds.), *Advances in Insect Physiology* (Vol. 3, pp. 53-132):  
650 Academic Press.
- 651 Copolovici, L., & Niinemets, Ü. (2016). Environmental Impacts on Plant Volatile Emission. In J. D.  
652 Blande & R. Glinwood (Eds.), *Deciphering Chemical Language of Plant Communication* (pp.  
653 35-59). Cham: Springer International Publishing.
- 654 Crespo, E., Hordijk, C. A., de Graaf, R. M., Samudrala, D., Cristescu, S. M., Harren, F. J., & van Dam, N.  
655 M. (2012). On-line detection of root-induced volatiles in *Brassica nigra* plants infested with  
656 *Delia radicum* L. root fly larvae. *Phytochemistry*, 84, 68-77.
- 657 Danner, H., Brown, P., Cator, E. A., Harren, F. J. M., van Dam, N. M., & Cristescu, S. M. (2015).  
658 Aboveground and Belowground Herbivores Synergistically Induce Volatile Organic Sulfur  
659 Compound Emissions from Shoots but Not from Roots. *Journal of chemical ecology*, 41(7),  
660 631-640. doi:10.1007/s10886-015-0601-y
- 661 Dixon, P. L., Coady, J. R., Larson, D. J., & Spaner, D. (2004). Undersowing rutabaga with white clover:  
662 impact on *Delia radicum* (Diptera: Anthomyiidae) and its natural enemies. *The Canadian*  
663 *Entomologist*, 136(3), 427-442.
- 664 Dobin, A., Davis, C. A., Schlesinger, F., Drenkow, J., Zaleski, C., Jha, S., . . . Gingeras, T. R. (2012). STAR:  
665 ultrafast universal RNA-seq aligner. *Bioinformatics*, 29(1), 15-21.  
666 doi:10.1093/bioinformatics/bts635
- 667 Dudchenko, O., Batra, S. S., Omer, A. D., Nyquist, S. K., Hoeger, M., Durand, N. C., . . . Aiden, E. L.  
668 (2017). De novo assembly of the *Aedes aegypti* genome using Hi-C yields  
669 chromosome-length scaffolds. *Science*, 356(6333), 92-95. doi:10.1126/science.aal3327
- 670 Durand, N. C., Shamim, M. S., Machol, I., Rao, S. S. P., Huntley, M. H., Lander, E. S., & Aiden, E. L.  
671 (2016). Juicer Provides a One-Click System for Analyzing Loop-Resolution Hi-C Experiments.  
672 *Cell Systems*, 3(1), 95-98. doi:<https://doi.org/10.1016/j.cels.2016.07.002>
- 673 Ekuere, U. U., Dossdall, L. M., Hills, M., Keddie, A. B., Kott, L., & Good, A. (2005). Identification,  
674 Mapping, and Economic Evaluation of QTLs Encoding Root Maggot Resistance in *Brassica*.  
675 *Crop Science*, 45(1), crops2005.0371. doi:<https://doi.org/10.2135/cropsci2005.0371>

- 676 Ferry, A., Dugravot, S., Delattre, T., Christides, J.-P., Auger, J., Bagnères, A.-G., . . . Cortesero, A.-M.  
677 (2007). Identification of a Widespread Monomolecular Odor Differentially Attractive to  
678 Several *Delia radicum* Ground-dwelling Predators in the Field. *Journal of chemical ecology*,  
679 33(11), 2064-2077. doi:10.1007/s10886-007-9373-3
- 680 Finch, S. (1978). Volatile plant chemicals and their effect on host plant finding by the cabbage root fly  
681 (*Delia Brassicae*). *Entomologia Experimentalis et Applicata*, 24(3), 350-359.  
682 doi:<https://doi.org/10.1111/j.1570-7458.1978.tb02793.x>
- 683 Finch, S., & Ackley, C. M. (1977). Cultivated and wild host plants supporting populations of the  
684 cabbage root fly. *Annals of Applied Biology*, 85(1), 13-22. doi:<https://doi.org/10.1111/j.1744-7348.1977.tb00626.x>
- 685 Fournet, S., Stapel, J., Kacem, N., Nenon, J., & Brunel, E. (2000). Life history comparison between two  
686 competitive *Aleochara* species in the cabbage root fly, *Delia radicum*: implications for their  
687 use in biological control. *Entomologia Experimentalis et Applicata*, 96(3), 205-211.
- 688 Gehlenborg, N. (2019). UpSetR: a more scalable alternative to Venn and Euler diagrams for visualizing  
689 intersecting sets [internet].
- 690 Gouinguene, S. P. D., & Städler, E. (2005). Comparison of the sensitivity of four *Delia* species to host  
691 and non-host plant compounds. *Physiological Entomology*, 30(1), 62-74.  
692 doi:<https://doi.org/10.1111/j.0307-6962.2005.00432.x>
- 693 Gouinguéné, S. P. D., & Städler, E. (2006). Comparison of the egg-laying behaviour and  
694 electrophysiological responses of *Delia radicum* and *Delia floralis* to cabbage leaf compounds.  
695 *Physiological Entomology*, 31(4), 382-389. doi:<https://doi.org/10.1111/j.1365-3032.2006.00532.x>
- 696 Griffiths, G. (1991). *Economic assessment of cabbage maggot damage in canola in Alberta*. Paper  
697 presented at the Proceedings of the GCIRC Eighth International Rapeseed Congress.
- 698 Guan, D., McCarthy, S. A., Wood, J., Howe, K., Wang, Y., & Durbin, R. (2020). Identifying and removing  
699 haplotypic duplication in primary genome assemblies. *Bioinformatics*, 36(9), 2896-2898.  
700 doi:10.1093/bioinformatics/btaa025
- 701 Hare, E. E., & Johnston, J. S. (2011). Genome Size Determination Using Flow Cytometry of Propidium  
702 Iodide-Stained Nuclei. In V. Orgogozo & M. V. Rockman (Eds.), *Molecular Methods for Evolutionary Genetics* (pp. 3-12). Totowa, NJ: Humana Press.
- 703 Hartman, T. P. V., & Southern, D. I. (1995). Genome reorganization from polyteny to polyploidy in the  
704 nurse cells found in onion fly (*Delia antiqua*) and cabbage root fly (*Delia radicum*) ovaries  
705 (Diptera, Anthomyiidae). *Chromosome Research*, 3(5), 271-280. doi:10.1007/BF00713064
- 706 Hoff, K. J., Lange, S., Lomsadze, A., Borodovsky, M., & Stanke, M. (2015). BRAKER1: Unsupervised  
707 RNA-Seq-Based Genome Annotation with GeneMark-ET and AUGUSTUS. *Bioinformatics*,  
708 32(5), 767-769. doi:10.1093/bioinformatics/btv661
- 709 Hoff, K. J., Lomsadze, A., Borodovsky, M., & Stanke, M. (2019). Whole-genome annotation with  
710 BRAKER *Gene prediction* (Vol. 1962, pp. 65-95). New York: Springer.
- 711 Hopkins, R. J., van Dam, N. M., & van Loon, J. J. (2009). Role of glucosinolates in insect-plant  
712 relationships and multitrophic interactions. *Annual review of entomology*, 54, 57-83.
- 713 Izumi, S., Yano, K., Yamamoto, Y., & Takahashi, S. Y. (1994). Yolk proteins from insect eggs: structure,  
714 biosynthesis and programmed degradation during embryogenesis. *Journal of Insect Physiology*, 40(9), 735-746.
- 715 Jaenicke, R., Heber, U., Franks, F., Chapman, D., Griffin, M. C. A., Hvidt, A., . . . Franks, F. (1990).  
716 Protein structure and function at low temperatures. *Philosophical Transactions of the Royal Society of London. B, Biological Sciences*, 326(1237), 535-553. doi:doi:10.1098/rstb.1990.0030
- 717
- 718
- 719
- 720
- 721

- 722 Jones, P., Binns, D., Chang, H.-Y., Fraser, M., Li, W., McAnulla, C., . . . Hunter, S. (2014). InterProScan 5:  
723 genome-scale protein function classification. *Bioinformatics*, *30*(9), 1236-1240.  
724 doi:10.1093/bioinformatics/btu031
- 725 Kapranas, A., Sbaiti, I., Degen, T., & Turlings, T. C. J. (2020). Biological control of cabbage fly *Delia*  
726 *radicum* with entomopathogenic nematodes: Selecting the most effective nematode species  
727 and testing a novel application method. *Biological Control*, *144*, 104212.  
728 doi:<https://doi.org/10.1016/j.biocontrol.2020.104212>
- 729 Katoh, K., Misawa, K., Kuma, K. i., & Miyata, T. (2002). MAFFT: a novel method for rapid multiple  
730 sequence alignment based on fast Fourier transform. *Nucleic acids research*, *30*(14), 3059-  
731 3066. doi:10.1093/nar/gkf436
- 732 Keilwagen, J., Hartung, F., Paulini, M., Twardziok, S. O., & Grau, J. (2018). Combining RNA-seq data  
733 and homology-based gene prediction for plants, animals and fungi. *BMC bioinformatics*,  
734 *19*(1), 189. doi:10.1186/s12859-018-2203-5
- 735 Keilwagen, J., Wenk, M., Erickson, J. L., Schattat, M. H., Grau, J., & Hartung, F. (2016). Using intron  
736 position conservation for homology-based gene prediction. *Nucleic acids research*, *44*(9), e89-  
737 e89. doi:10.1093/nar/gkw092
- 738 Kergunteuil, A., Dugravot, S., Danner, H., van Dam, N. M., & Cortesero, A. M. (2015). Characterizing  
739 Volatiles and Attractiveness of Five Brassicaceous Plants with Potential for a 'Push-Pull'  
740 Strategy Toward the Cabbage Root Fly, *Delia radicum*. *Journal of chemical ecology*, *41*(4), 330-  
741 339. doi:10.1007/s10886-015-0575-9
- 742 Kissen, R., Rossiter, J. T., & Bones, A. M. (2009). The 'mustard oil bomb': not so easy to assemble?!  
743 Localization, expression and distribution of the components of the myrosinase enzyme  
744 system. *Phytochemistry Reviews*, *8*(1), 69-86.
- 745 Kolde, R. (2019). Package 'pheatmap'. *R package*, *1.0.12*.
- 746 Konopka, T. (2020). umap: Uniform Manifold Approximation and Projection. *R package version*,  
747 *0.2.7.0*.
- 748 Koren, S., Walenz, B. P., Berlin, K., Miller, J. R., Bergman, N. H., & Phillippy, A. M. (2017). Canu:  
749 scalable and accurate long-read assembly via adaptive k-mer weighting and repeat  
750 separation. *Genome research*, *gr*. 215087.215116.
- 751 Krzywinski, M., Schein, J., Birol, I., Connors, J., Gascoyne, R., Horsman, D., . . . Marra, M. A. (2009).  
752 Circos: An information aesthetic for comparative genomics. *Genome research*, *19*(9), 1639-  
753 1645. doi:10.1101/gr.092759.109
- 754 Lachaise, T., Ourry, M., Lebreton, L., Guillerm-Erckelboudt, A.-Y., Linglin, J., Paty, C., . . . Mougel, C.  
755 (2017). Can soil microbial diversity influence plant metabolites and life history traits of a  
756 rhizophagous insect? A demonstration in oilseed rape. *Insect Science*, *24*(6), 1045-1056.  
757 doi:10.1111/1744-7917.12478
- 758 Lamy, F., Dugravot, S., Cortesero, A. M., Chaminade, V., Faloya, V., & Poinot, D. (2018). One more  
759 step toward a push-pull strategy combining both a trap crop and plant volatile organic  
760 compounds against the cabbage root fly *Delia radicum*. *Environmental Science and Pollution*  
761 *Research*, *25*(30), 29868-29879. doi:10.1007/s11356-017-9483-6
- 762 Li, H., Handsaker, B., Wysoker, A., Fennell, T., Ruan, J., Homer, N., . . . Subgroup, G. P. D. P. (2009). The  
763 Sequence Alignment/Map format and SAMtools. *Bioinformatics*, *25*(16), 2078-2079.  
764 doi:10.1093/bioinformatics/btp352
- 765 Lo, N., Casiraghi, M., Salati, E., Bazzocchi, C., & Bandi, C. (2002). How Many *Wolbachia* Supergroups  
766 Exist? *Molecular Biology and Evolution*, *19*(3), 341-346.  
767 doi:10.1093/oxfordjournals.molbev.a004087

- 768 Lomsadze, A., Burns, P. D., & Borodovsky, M. (2014). Integration of mapped RNA-Seq reads into  
769 automatic training of eukaryotic gene finding algorithm. *Nucleic acids research*, 42(15), e119-  
770 e119. doi:10.1093/nar/gku557
- 771 McDonald, R., & Sears, M. (1992). Assessment of larval feeding damage of the cabbage maggot  
772 (Diptera: Anthomyiidae) in relation to oviposition preference on canola. *Journal of economic*  
773 *entomology*, 85(3), 957-962.
- 774 Michaud, S., Marin, R., Westwood, J. T., & Tanguay, R. M. (1997). Cell-specific expression and heat-  
775 shock induction of Hsps during spermatogenesis in *Drosophila melanogaster*. *Journal of Cell*  
776 *Science*, 110(17), 1989-1997. doi:10.1242/jcs.110.17.1989
- 777 Neveu, N., Krespi, L., Kacem, N., & Nénon, J. P. (2000). Host-stage selection by *Trybliographa rapae*, a  
778 parasitoid of the cabbage root fly *Delia radicum*. *Entomologia Experimentalis et Applicata*,  
779 96(3), 231-237.
- 780 Nottingham, S. (1988). Host-plant finding for oviposition by adult cabbage root fly, *Delia radicum*.  
781 *Journal of Insect Physiology*, 34(3), 227-234.
- 782 R Core Team. (2020). R: A Language and Environment for Statistical Computing [R]. R Foundation for  
783 Statistical Computing. Vienna, Austria.
- 784 Robinson, O., Dylus, D., & Dessimoz, C. (2016). Phylo.io : Interactive Viewing and Comparison of Large  
785 Phylogenetic Trees on the Web. *Molecular Biology and Evolution*, 33(8), 2163-2166.  
786 doi:10.1093/molbev/msw080
- 787 Roessingh, P., & Städler, E. (1990). Foliar form, colour and surface characteristics influence oviposition  
788 behaviour in the cabbage root fly *Delia radicum*. *Entomologia Experimentalis et Applicata*,  
789 57(1), 93-100. doi:10.1111/j.1570-7458.1990.tb01419.x
- 790 Roessingh, P., Städler, E., Fenwick, G., Lewis, J., Nielsen, J. K., Hurter, J., & Ramp, T. (1992).  
791 Oviposition and tarsal chemoreceptors of the cabbage root fly are stimulated by  
792 glucosinolates and host plant extracts. *Entomologia Experimentalis et Applicata*, 65(3), 267-  
793 282.
- 794 Sato, K., & Touhara, K. (2008). Insect olfaction: receptors, signal transduction, and behavior. In S.  
795 Korsching & W. Meyerhof (Eds.), *Chemosensory systems in mammals, fishes, and insects* (Vol.  
796 47, pp. 203-220). Berlin, Heidelberg: Springer.
- 797 Schramm, K., Vassão, D. G., Reichelt, M., Gershenson, J., & Wittstock, U. (2012). Metabolism of  
798 glucosinolate-derived isothiocyanates to glutathione conjugates in generalist lepidopteran  
799 herbivores. *Insect biochemistry and molecular biology*, 42(3), 174-182.
- 800 Seppey, M., Manni, M., & Zdobnov, E. M. (2019). BUSCO: assessing genome assembly and annotation  
801 completeness. In K. M. (Ed.), *Gene prediction* (Vol. 1962, pp. 227-245). New York: Springer.
- 802 Sonesson, C., Love, M. I., & Robinson, M. D. (2015). Differential analyses for RNA-seq: transcript-level  
803 estimates improve gene-level inferences. *F1000Research*, 4.
- 804 Stamatakis, A. (2014). RAxML version 8: a tool for phylogenetic analysis and post-analysis of large  
805 phylogenies. *Bioinformatics*, 30(9), 1312-1313. doi:10.1093/bioinformatics/btu033
- 806 Stanke, M., Schöffmann, O., Morgenstern, B., & Waack, S. (2006). Gene prediction in eukaryotes with  
807 a generalized hidden Markov model that uses hints from external sources. *BMC*  
808 *bioinformatics*, 7(1), 62. doi:10.1186/1471-2105-7-62
- 809 Steinegger, M., & Söding, J. (2017). MMseqs2 enables sensitive protein sequence searching for the  
810 analysis of massive data sets. *Nature biotechnology*, 35(11), 1026-1028. doi:10.1038/nbt.3988
- 811 Törönen, P., Medlar, A., & Holm, L. (2018). PANNZER2: a rapid functional annotation web server.  
812 *Nucleic acids research*, 46(W1), W84-W88. doi:10.1093/nar/gky350
- 813 Trapnell, C., Williams, B. A., Pertea, G., Mortazavi, A., Kwan, G., van Baren, M. J., . . . Pachter, L.  
814 (2010). Transcript assembly and quantification by RNA-Seq reveals unannotated transcripts

- 815 and isoform switching during cell differentiation. *Nature biotechnology*, 28(5), 511-515.  
816 doi:10.1038/nbt.1621
- 817 Tsunoda, T., Krosse, S., & van Dam, N. M. (2017). Root and shoot glucosinolate allocation patterns  
818 follow optimal defence allocation theory. *Journal of Ecology*, 105(5), 1256-1266.  
819 doi:10.1111/1365-2745.12793
- 820 van Dam, N. M., Tytgat, T. O., & Kirkegaard, J. A. (2009). Root and shoot glucosinolates: a comparison  
821 of their diversity, function and interactions in natural and managed ecosystems.  
822 *Phytochemistry Reviews*, 8(1), 171-186.
- 823 van Herk, W. G., Vernon, R. S., Waterer, D. R., Tolman, J. H., Lafontaine, P. J., & Prasad, R. P. (2016).  
824 Field Evaluation of Insecticides for Control of Cabbage Maggot (Diptera: Anthomyiidae) in  
825 Rutabaga in Canada. *Journal of economic entomology*, 110(1), 177-185.  
826 doi:10.1093/jee/tow238
- 827 Wang, S., Voorrips, R. E., Steenhuis-Broers, G., Vosman, B., & van Loon, J. J. (2016). Antibiosis  
828 resistance against larval cabbage root fly, *Delia radicum*, in wild Brassica-species. *Euphytica*,  
829 211(2), 139-155.
- 830 Werren, J. H., & Windsor, D. M. (2000). Wolbachia infection frequencies in insects: evidence of a  
831 global equilibrium? *Proceedings of the Royal Society of London. Series B: Biological Sciences*,  
832 267(1450), 1277-1285. doi:doi:10.1098/rspb.2000.1139
- 833 West, P. T., Probst, A. J., Grigoriev, I. V., Thomas, B. C., & Banfield, J. F. (2018). Genome-  
834 reconstruction for eukaryotes from complex natural microbial communities. *Genome*  
835 *research*, 28(4), 569-580. doi:10.1101/gr.228429.117
- 836 Wiegmann, B. M., Trautwein, M. D., Winkler, I. S., Barr, N. B., Kim, J.-W., Lambkin, C., . . . Yeates, D. K.  
837 (2011). Episodic radiations in the fly tree of life. *Proceedings of the National Academy of*  
838 *Sciences*, 108(14), 5690-5695. doi:10.1073/pnas.1012675108
- 839 Wittstock, U., & Gershenson, J. (2002). Constitutive plant toxins and their role in defense against  
840 herbivores and pathogens. *Current Opinion in Plant Biology*, 5(4), 300-307.  
841 doi:[https://doi.org/10.1016/S1369-5266\(02\)00264-9](https://doi.org/10.1016/S1369-5266(02)00264-9)  
842 (Fournet et al., 2000)

843

844

845

846

847

848

849

850 Tables and Figures

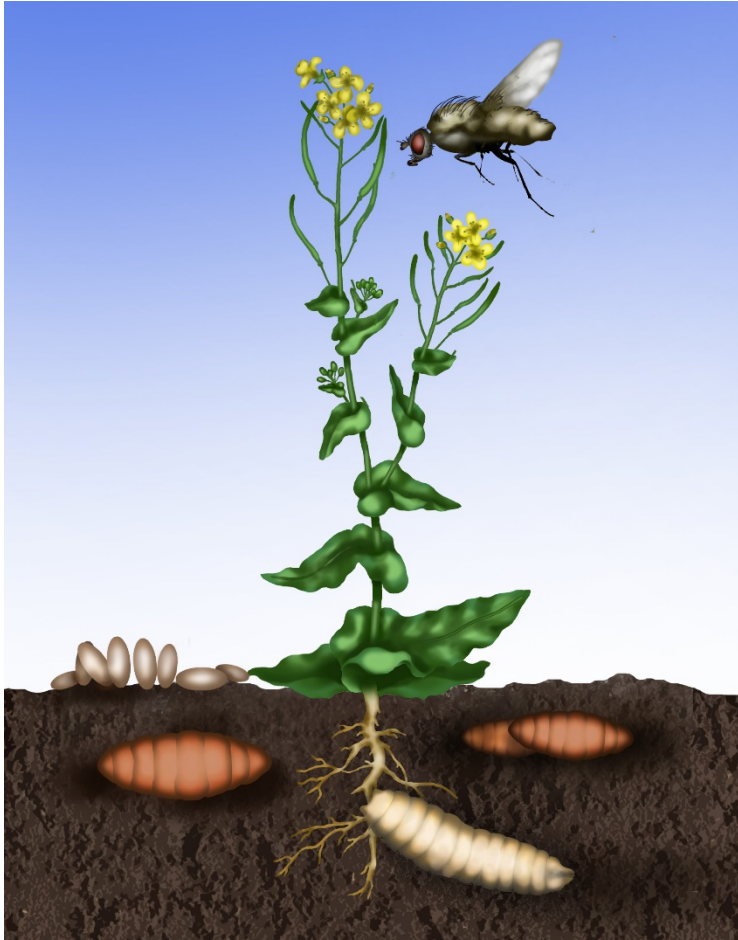

851

852 Figure 1

853 Schematic illustration of the life stages and their habitats of the cabbage root fly *Delia radicum*. Adult  
854 flies are attracted by their host plants for food consumption and oviposition. Eggs are deposited on the  
855 soil, where the larvae hatch. Larvae dig into the soil to feed on the roots until they pupate. After  
856 completing metamorphosis, adult flies make their way above ground to feed on pollen and nectar, and  
857 to reproduce.

858 Picture: Jennifer Gabriel

859

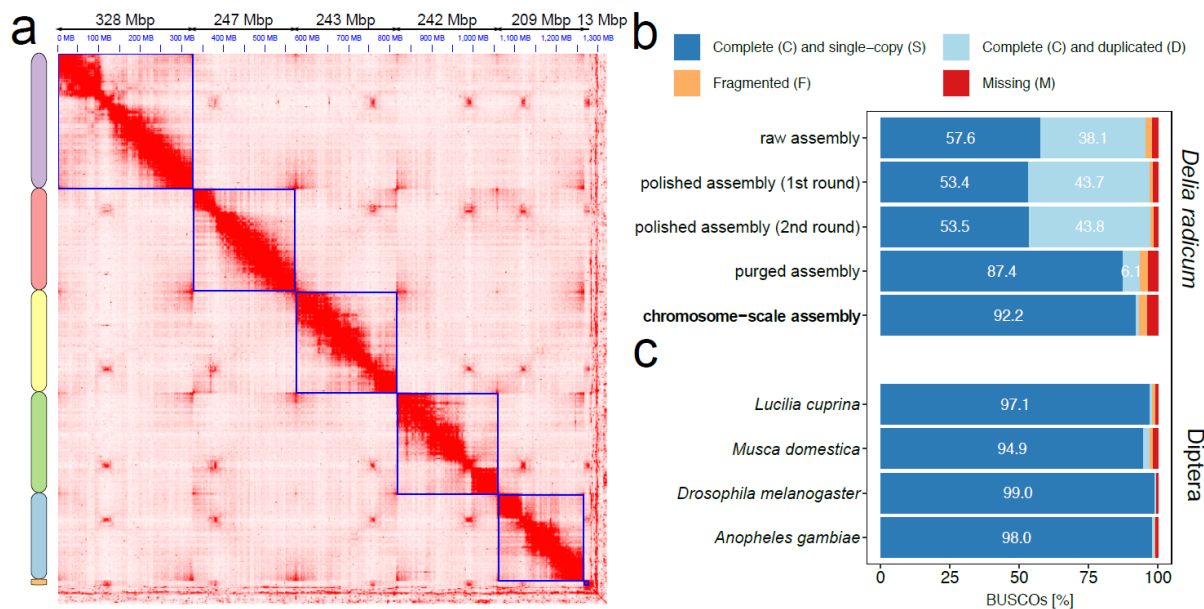

860

861

**Figure 2**

862

Chromosome-scale assembly of the *Delia radicum* genome.

863

(a) Heatmap showing the Hi-C contacts map of the final chromosome-scale assembly, where the six chromosomes (six super-scaffolds) are indicated by the blue boxes. The chromosomes are ordered from largest to smallest; their concrete lengths are given in Mbp above the Hi-C map.

867

(b) Barplot showing the result of BUSCO analyses of the intermediate and final assemblies using the 'Diptera' gene set containing 3,285 genes. Numbers in the bars give the percentage of genes found for the category indicated by the color of the bar.

870

(c) Barplot showing the result of BUSCO analyses using the 'Diptera' gene set of four other dipteran species with published genomes. Numbers in the bars give the percentage of genes found for the category indicated by the color of the bar.

873

874

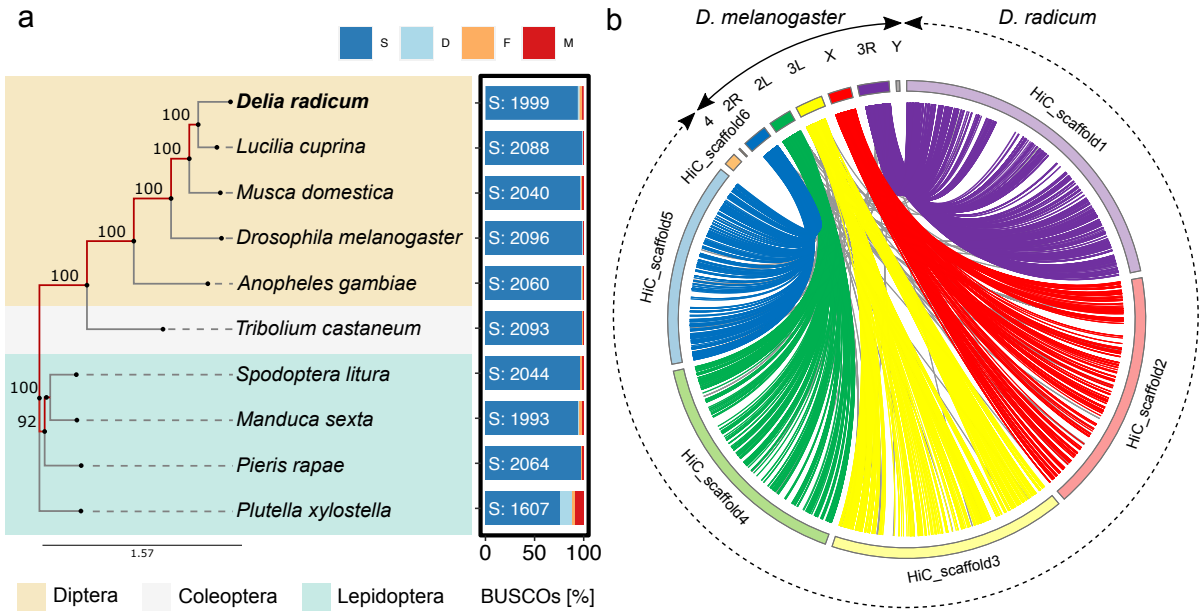

875  
876  
877

878 **Figure 3**

879 Phylogenetic analyses.

880 (a) A phylogenetic tree reconstructed with RAxML on concatenated alignments of proteins of 1,271  
881 genes of BUSCOs' Endopterygota gene set (n=2,124) shared by all ten insect species. Tree  
882 reconstruction was done including 100 bootstrapping steps. The level of bootstrapping support is given  
883 at the edges. The barplot to the right of the phylogenetic tree shows BUSCO results of each species on  
884 the Endopterygota gene set, where S: number of complete single-copy BUSCO genes (dark blue bar);  
885 D: duplicated complete copy genes (light blue), F: fragmented genes (orange), M: missing genes (red).  
886 (b) A Circos plot linking genes on the assembled scaffolds of *Delia radicum* (HiC\_scaffold 1 - 6) to  
887 homologues on the *Drosophila melanogaster* chromosomes (2R/2L, 3R/3L, 4, X and Y). Each line  
888 connects homologue regions of at least two consecutive genes. Colored lines indicate that homologue  
889 regions of a *D. melanogaster* chromosome are connected to those of the syntenic chromosome of *D.*  
890 *radicum*. Otherwise they are colored in grey.



891

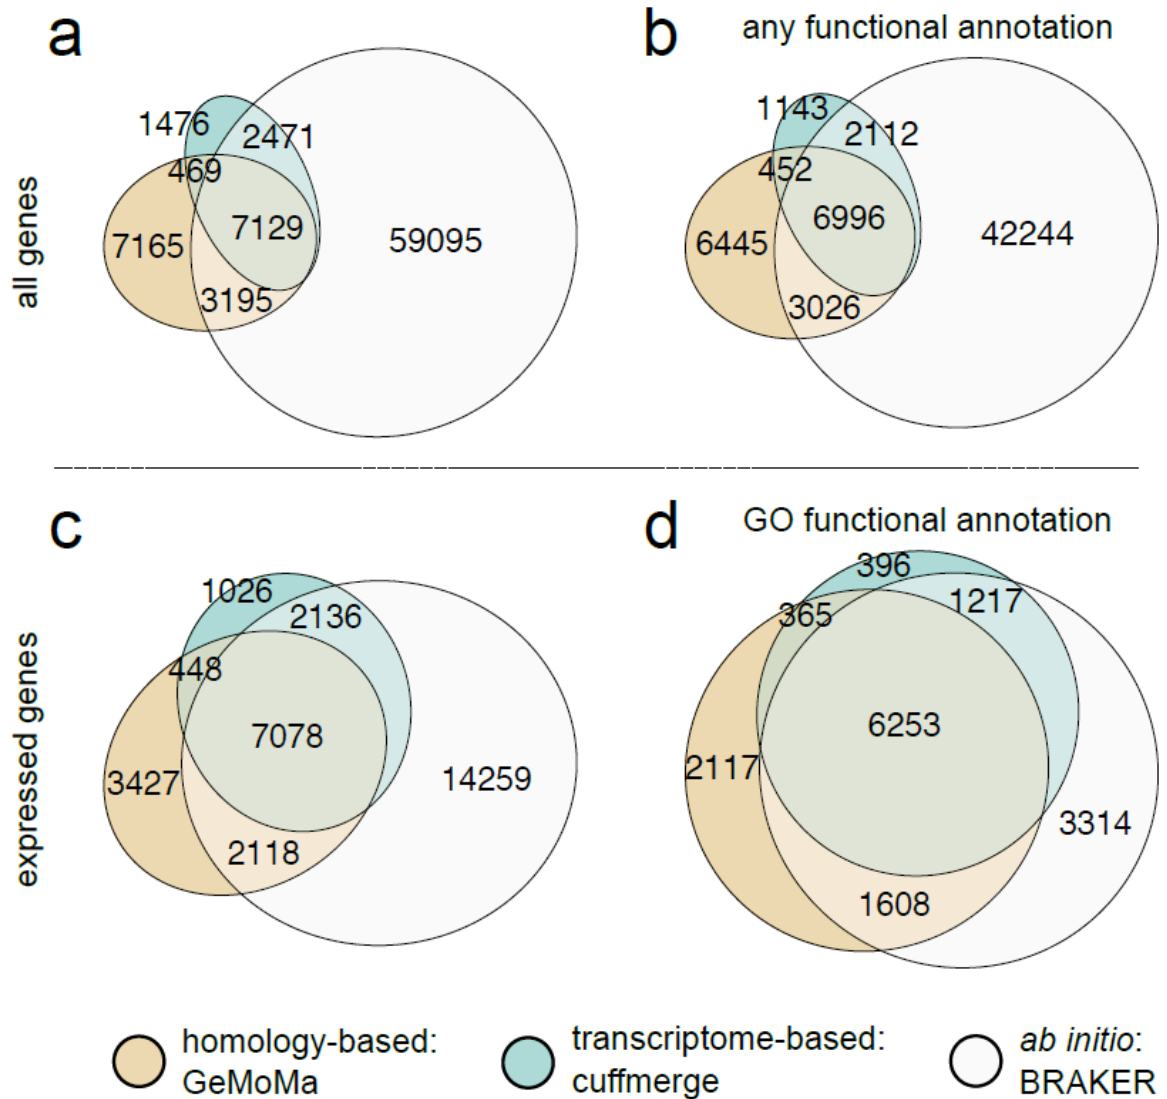

892  
893  
894

**Figure 4**

895 Venn diagrams containing the numbers of genes in the *Delia radicum* genome predicted by  
896 homology-based, transcriptome-based or *ab initio* approaches, or a combination thereof. The  
897 numbers of genes in the diagrams are based on

- 898 (a) all predicted genes;  
899 (b) all predicted genes with any functional annotation, which includes GO annotation and/or  
900 protein family or domain annotation;  
901 (c) expressed genes which were predicted genes with a Transcript Per Million (TPM) value  $\geq 1$ .  
902 TPM values result from analyses of our in-house life cycle RNASeq data. ;  
903 (d) expressed genes with I think that is a great a functional annotation based on GO annotation.

904

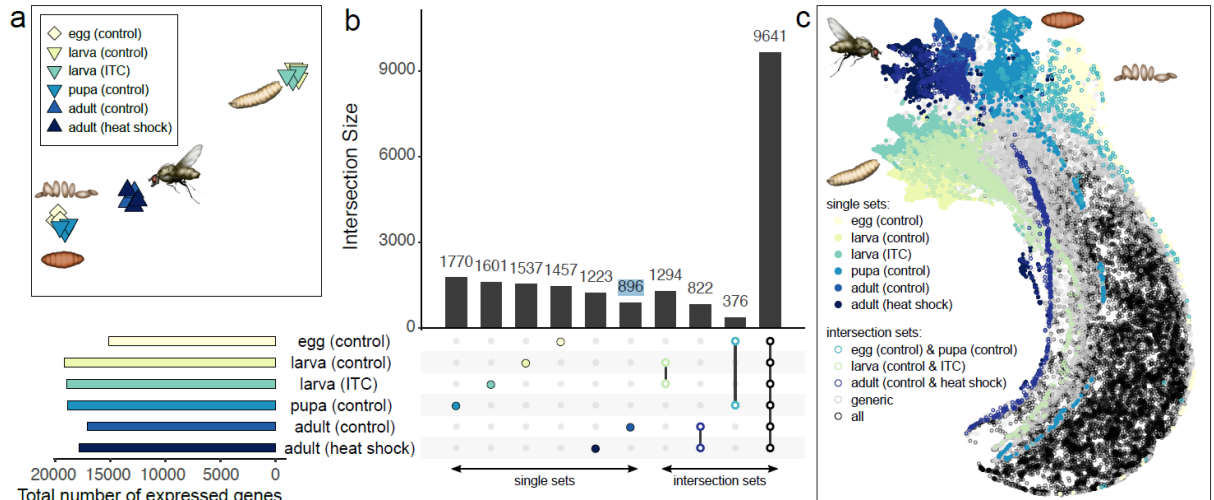

905  
906  
907

908

### Figure 5

909

Differences in gene expression profiles among *Delia radicum* life stages and stress conditions.

910

(a) Uniform Manifold Approximation and Projection (UMAP) plot showing differences among the life stages based on differing gene expression. ITC = larvae fed on diets with 2  $\mu$ M phenylethyl isothiocyanate in their diet.

913

(b) UpSet plot showing the number of genes that are exclusively expressed (Transcripts Per Million (TPM) value  $\geq 1$ ) in at least one replicate of a life stage or a stress condition (first 6 bars, filled circles); expressed in both conditions within larva and adult life stage (bar 7 and 8, green and dark blue open circles), or both in eggs and pupae (bar 9, cyan open circles), and those expressed in all 18 samples (last bar, open black circles). A selection of intersection sets is shown, whereas the full set is presented in Figure S4. To the left, the total number of expressed genes per life stage and stress condition is shown (colored horizontal bar plot below sub figure a). The remaining genes, referred to as generic, are not shown and sum up to 9,875 genes.

921

(c) UMAP of expressed genes. Genes are colored according to the sets in (b) and are plotted with filled circles when they belong to single sets and with open circles when they belong to intersection sets. Genes expressed in all 18 samples are labeled as "all" (black open circles). Remaining genes are labeled as "generic" (grey open circles).

925

926

927

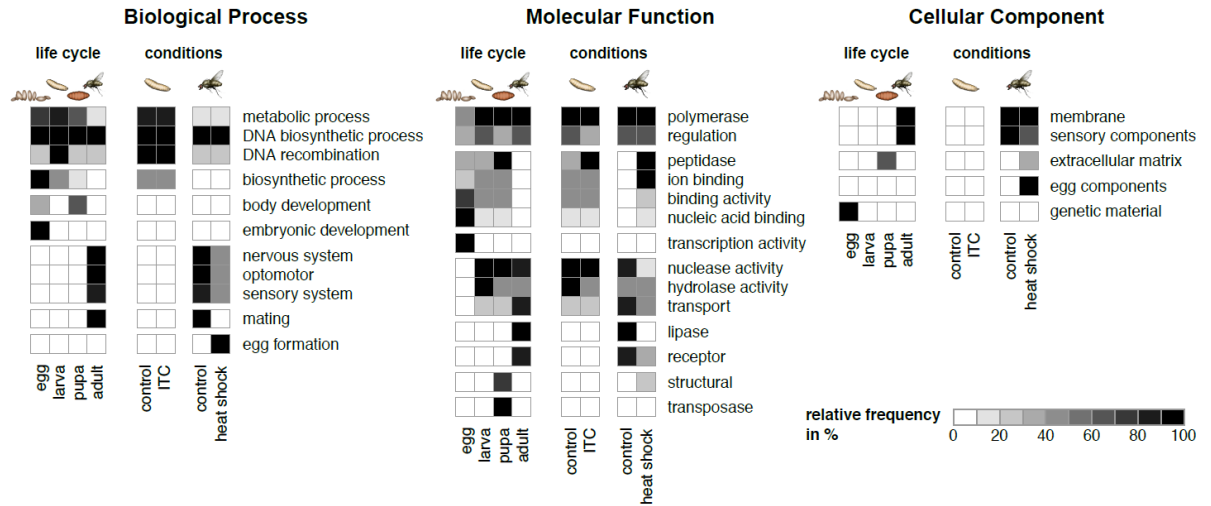

928

929

### Figure 6

930

931

932

933

934

935

936

937

938

939

940

941

942

943

944

945

Gene ontology (GO) analyses on biological process (BP), molecular function (MF) and cellular component (CC) ontologies, based on expressed genes (Transcripts Per Million (TPM) value  $\geq$  1). Results are shown in three respective heatmaps, where rows are labeled by generic categories and columns with life stages and/or conditions. Explicit GO annotations of expressed genes are collapsed into more generic categories. Hence, each cell in a heatmap contains the relative frequency of GO terms sorted into a specific generic category for a specific life stage and/or condition. Only GO terms that were significantly overrepresented in a GO-enrichment analysis (Fisher's exact test,  $P < 0.05$  after correction with Benjamini - Yekutieli) are considered. Expanded versions of the heatmaps, where detailed GO annotations for each generic category are listed, are provided in Figure S4.

In all heatmaps the block with four columns to the left shows the results of all stage of the life cycle under control conditions, whereas the columns to the right show the relative frequencies determined for larvae and adults under control or stress conditions; the data for the control conditions in larva and adult stage are duplicated for easier comparison.

ITC = larvae fed on diet with 2-phenylethyl isothiocyanate.

946 **Table 1** 9 selected insect species.  
 947 9 insect species (4 Diptera, 4 Lepidoptera, and 1 Coleoptera species) selected for comparative  
 948 genomics and phylogenetic analyses. Insect species were chosen according to their phylogenetic  
 949 relatedness to *D. radicum*, or because they shared the same host plant range with *D. radicum* or  
 950 because they are also common pests in agriculture. All 9 species are fully sequenced and annotated,  
 951 and information can be obtained from National Center for Biotechnology  
 952 (<https://www.ncbi.nlm.nih.gov>).  
 953  
 954

| Order       | Species                        | NCBI taxid | Names                    | RefSeq ID       | Reason for selection          |
|-------------|--------------------------------|------------|--------------------------|-----------------|-------------------------------|
| Diptera     | <i>Anopheles gambiae</i>       | 180454     | African malaria mosquito | GCF_000005575.2 | phylogenetically related      |
| Diptera     | <i>Drosophila melanogaster</i> | 7227       | fruit fly                | GCF_000001215.4 | phylogenetically related      |
| Diptera     | <i>Lucilia cuprina</i>         | 7375       | Australian sheep blowfly | GCF_000699065.1 | phylogenetically related      |
| Diptera     | <i>Musca domestica</i>         | 7370       | house fly                | GCF_000371365.1 | phylogenetically related      |
| Lepidoptera | <i>Manduca sexta</i>           | 7130       | tobacco hornworm         | GCF_000262585.1 | common pests on crop plants   |
| Lepidoptera | <i>Pieris rapae</i>            | 64459      | cabbage white            | GCF_001856805.1 | sharing host plant            |
| Lepidoptera | <i>Plutella xylostella</i>     | 51655      | diamondback moth         | GCF_000330985.1 | sharing host plant            |
| Lepidoptera | <i>Spodoptera litura</i>       | 69820      | Tobacco cutworm          | GCF_002706865.1 | common pests on crop plants   |
| Coleoptera  | <i>Tribolium castaneum</i>     | 7070       | red flour beetle         | GCF_000002335.3 | common pests on stored grains |

955  
 956

957 **Table 2** Summary of assembly statistics.  
 958 The raw, polished, and purged assemblies are intermediate assemblies after PacBio read assembly with  
 959 Canu, two rounds of polishing with Arrow, and purging with purge\_dups. The final, chromosome-scale  
 960 assembly, generated with the 3D-DNA genome assembly pipeline that assembled contigs of the purged  
 961 assembly by integration of Hi-C Illumina reads into (chromosome-scale) scaffolds. The final  
 962 chromosome-scale assembly contains 6,190 gaps of length 100 bp, whereby 6,188 gaps are located on  
 963 the 6 pseudo-chromosomes.  
 964

| Assembly                        | Number of bases | Number of contigs <sup>†</sup> or scaffolds <sup>‡</sup> | N50         | L50   | N90         | L90    | Longest contig <sup>†</sup> or scaffold <sup>‡</sup> |
|---------------------------------|-----------------|----------------------------------------------------------|-------------|-------|-------------|--------|------------------------------------------------------|
| raw assembly                    | 2,538,077,247   | 29,244 <sup>†</sup>                                      | 205,306     | 2,197 | 32,594      | 16,335 | 6,127,675                                            |
| polished assembly               | 2,544,504,558   | 29,244 <sup>†</sup>                                      | 205,665     | 2,201 | 32,715      | 16,338 | 6,133,028                                            |
| Purged assembly                 | 1,325,508,377   | 7,014 <sup>†</sup>                                       | 656,541     | 485   | 74,470      | 2,765  | 6,133,028                                            |
| final chromosome-scale assembly | 1,326,127,377   | 2,987 <sup>‡</sup>                                       | 242,504,274 | 3     | 208,954,159 | 5      | 328,483,116                                          |
| 6 pseudo-chromosomes only       | 1,281,926,506   | 6 <sup>‡</sup>                                           | 242,504,274 | 3     | 208,954,149 | 5      | 328,483,116                                          |

965 † numbers given for the raw, polished and purged assembly refer to contigs  
 966 ‡ numbers given for the chromosome-scale assembly and the 6 pseudo-chromosomes refer to  
 967 scaffolds  
 968  
 969

970 **Table 3** Summary of gene prediction statistics.

971 Number of gene predictions made on the chromosome-scale genome assembly of *D. radicum* by the  
 972 three different approaches: GeMoMa a sequence homology-based approach, Cufflinks a RNASeq  
 973 data-based approach to assemble transcriptomes, and BRAKER an approach for *ab initio* predictions  
 974 of genes. The final comprehensive gene annotation for the *D. radicum* genome contains 81,000  
 975 putative genes.  
 976

| Approach  | Description         | Number of transcripts | Number of genes |
|-----------|---------------------|-----------------------|-----------------|
| Cufflinks | transcriptome-based | 23729                 | 16188           |
| GeMoMa    | homology-based      | 46286                 | 19343           |
| BRAKER    | ab initio           | 82473                 | 72613           |
| final     |                     | 121731                | 81000           |

977  
 978

979 **Table 4** Summary of Gene Ontology (GO) annotations of expressed genes.

980 30,492 genes of the 81,000 genes were expressed (TPM value  $\geq 1$ ) in our in-house life stage RNASeq  
 981 data set. Genes were annotated with GO classes using PANNZER2 and InterProScan. Genes  
 982 exclusively expressed in one specific life stage were grouped into gene sets named according to the  
 983 life stage. For the larvae and the adult stage were control and stress conditions are present in the data  
 984 set, genes that are expressed in both conditions within one life stage were added to the life stage and  
 985 condition specific gene sets. Numbers of the row labeled with “total” are in concordance with Figure 5b.  
 986 Listed gene sets were used for life stage specific GO enrichment analyses.  
 987

| set/ontology    | complete | egg<br>(control) | larva<br>(control) | pupa<br>(control) | adult<br>(control) | larva<br>(ITC) | adult<br>(heatshock) |
|-----------------|----------|------------------|--------------------|-------------------|--------------------|----------------|----------------------|
| total           | 30492    | 1457             | 2831               | 1770              | 1718               | 2895           | 2045                 |
| noGO            | 15222    | 1029             | 2021               | 1288              | 1096               | 2079           | 1225                 |
| GO              | 15270    | 428              | 810                | 482               | 622                | 816            | 820                  |
| BP <sup>†</sup> | 11262    | 262              | 501                | 289               | 406                | 495            | 534                  |
| MF <sup>‡</sup> | 13513    | 397              | 717                | 429               | 537                | 723            | 729                  |
| CC <sup>§</sup> | 10917    | 230              | 444                | 260               | 381                | 434            | 454                  |

988 † BP: Biological Process, ‡ MF: Molecular Function, § CC: Cellular Compartment  
 989
